# Supplementary material for: Functional Validation of Glutamine synthetase and Glutamate synthase Genes in Durum Wheat near Isogenic Lines with QTL for High GPC
Source: PubMed Central journal article supplement (PMC7730160; doi:10.3390/ijms21239253), 2020-12-04
Supplement: ijms-21-09253-s001.pdf [file ijms-21-09253-s001.pdf]

Supplementary Table 1. Oligo name and sequences of primer combinations used to amplify promoter regions of *GS2* and *Fd-GOGAT* homoeologous genes.

| Oligo name     | 5'-3' sequence           |
|----------------|--------------------------|
| GS2_2A-1F      | TTTGCCGAACAGTTTGTCT      |
| GS2_2A-1R      | GAGCCAGAGGGAAGGAACAT     |
| GS2_2A-2F      | GTCCTGTACACACTCCGA       |
| GS2_2A-2R      | GTTTCTGGACCGTTTGCC       |
| GS2_2A-3F      | GTTCCATAGGGACATGGCGTG    |
| GS2_2A-3R      | GTCCTGTACACACTCCGA       |
| GS2_2A-4F      | TCATATCCGGAGCCAGAGGGA    |
| GS2_2A-4R      | GGAGTAAGTAAGTAAGCAGCGG   |
| GS2_2B-1F      | TCAGTTCTTGTACA CACCG C   |
| GS2_2B-1R      | ACCTTTCAGCTGTTACACGAA    |
| GS2_2B-2F      | ATTTCCGGATCAGTTCTTGTACA  |
| GS2_2B-2R      | CTGCAGCATAATCCCTGTAGC    |
| GS2_2B-3F      | ACCTTTCAGCTGTTACACGAA    |
| GS2_2B-3R      | GTGTGTGCCTTCTTTGGACG     |
| GS2_2B-4F      | CTCTATCCGAGATGTGTGTGC    |
| GS2_2B-4R      | AAGGCGGCGGAGTAAGTAAG     |
| GS2_2B-5F      | AATAATATTTCCAGCGCGATCTC  |
| GS2_2B-5R      | CCCACCTGGCACTGCATC       |
| Fd-GOGAT_2A-1F | TGACCGGCTGAATTCTACCA     |
| Fd-GOGAT_2A-1R | CCTCCCCAATCCTGCAGAG      |
| Fd-GOGAT_2A-2F | GACAAACGCACTCCTCATTCA    |
| Fd-GOGAT_2A-2R | TACTCCTCTCCTCTCCTCCCCAC  |
| Fd-GOGAT_2A-3F | TCCTCCCCACCGCAGCACC      |
| Fd-GOGAT_2A-3R | AGGAGGTATGGCTCGCTCTG     |
| Fd-GOGAT_2A-4F | CCCGCGCAGGAGGTATGGCTCGCT |
| Fd-GOGAT_2A-4R | GCTTGTGGTGTGGGTTTGT      |
| Fd-GOGAT_2B-1F | TGGAGAAGGAAAGGGGAAGG     |
| Fd-GOGAT_2B-1R | ATGAGAAGCTTGACATGCCC     |
| Fd-GOGAT_2B-2F | ACATATCACCATTACCAGCC     |
| Fd-GOGAT_2B-2R | GTTCTACCCATCAGCGCAAG     |
| Fd-GOGAT_2B-3F | CAACACGCCAGCATCATCAA     |
| Fd-GOGAT_2B-3R | GGCCCCTTTCCTGATCCAT      |
| Fd-GOGAT_2B-4F | AATCACCCCTATACAAAACGTCA  |
| Fd-GOGAT_2B-4R | GAAATCAAACCCAATCGCGAG    |
